# Supplementary material
Source: PubMed Central journal article supplement (PMC2643490)

**Supplemental Table 1. Plasmids used in this study**

| Plasmid                             | Encoded protein                                                                        | Source/reference          |
|-------------------------------------|----------------------------------------------------------------------------------------|---------------------------|
| pBA174                              | Cyt-OmpC 50 in pBAD33, Cm <sup>R</sup>                                                 | Walsh et. al. 2003        |
| pBAD33                              | Vector, pACYC ori, Para, Cm <sup>R</sup>                                               | Guzman et. al. 1995       |
| pFlag-MAC                           | Vector for cytoplasmic expression of Flag tagged proteins, pBR322 ori, Ap <sup>R</sup> | Sigma                     |
| pFlag-ATS                           | Vector for periplasmic expression of Flag-tagged proteins, pBR322 ori, Ap <sup>R</sup> | Sigma                     |
| pHisTrxRseA169-196                  | His-Trx-tagged RseA169-196 in pET28a                                                   | Kim et. al. 2007          |
| pHisTrxRseA169-196 <sup>I173A</sup> | I173A mutant of RseA169-196 peptide in pET28a, Ap <sup>R</sup>                         | This work                 |
| pHisTrxRseA169-196 <sup>N174A</sup> | N174A mutant of RseA169-196 peptide in pET28a, Ap <sup>R</sup>                         | This work                 |
| pHisTrxRseA169-196 <sup>M176A</sup> | M176A mutant of RseA169-196 peptide in pET28a, Ap <sup>R</sup>                         | This work                 |
| pHisTrxRseA169-196 <sup>L177A</sup> | L177A mutant of RseA169-196 peptide in pET28a, Ap <sup>R</sup>                         | This work                 |
| pHisTrxRseA169-196 <sup>Q178A</sup> | Q178A mutant of RseA169-196 peptide in pET28a, Ap <sup>R</sup>                         | This work                 |
| pHisTrxRseA169-196 <sup>D179A</sup> | D179A mutant of RseA169-196 peptide in pET28a, Ap <sup>R</sup>                         | This work                 |
| pHisTrxRseA169-196 <sup>Y180A</sup> | Y180A mutant of RseA169-196 peptide in pET28a, Ap <sup>R</sup>                         | This work                 |
| pHisTrxRseA169-196 <sup>E181A</sup> | E181A mutant of RseA169-196 peptide in pET28a, Ap <sup>R</sup>                         | This work                 |
| pHisTrxRseA169-196 <sup>L182A</sup> | L182A mutant of RseA169-196 peptide in pET28a, Ap <sup>R</sup>                         | This work                 |
| pHisTrxRseA169-196 <sup>Q183A</sup> | Q183A mutant of RseA169-196 peptide in pET28a, Ap <sup>R</sup>                         | This work                 |
| pHisTrxRseA169-196 <sup>R185A</sup> | R185A mutant of RseA169-196 peptide in pET28a, Ap <sup>R</sup>                         | This work                 |
| pHisTrxRseA169-196 <sup>L186A</sup> | L186A mutant of RseA169-196 peptide in pET28a, Ap <sup>R</sup>                         | This work                 |
| pHisTrxRseA169-196 <sup>H187A</sup> | H187A mutant of RseA169-196 peptide in pET28a, Ap <sup>R</sup>                         | This work                 |
| pHisTrxRseA169-196 <sup>S188A</sup> | S188A mutant of RseA169-196 peptide in pET28a, Ap <sup>R</sup>                         | This work                 |
| pHisTrxRseA169-196 <sup>E189A</sup> | E189A mutant of RseA169-196 peptide in pET28a, Ap <sup>R</sup>                         | This work                 |
| pLC234                              | His-tagged RseA periplasmic domain in pET28b, Kan <sup>R</sup>                         | De Las Penas et. al. 1997 |
| pRseB-MAC                           | RseB <sup>24-318</sup> in pFlag-MAC, Ap <sup>R</sup>                                   | This work                 |
| pRseB-MAC <sup>R238A+R239A</sup>    | R238A+R239A in pRseB-MAC, Ap <sup>R</sup>                                              | This work                 |
| pRseB-MAC <sup>D245A</sup>          | D245A in pRseB-MAC, Ap <sup>R</sup>                                                    | This work                 |
| pRseB-MAC <sup>N246A</sup>          | N246A in pRseB-MAC, Ap <sup>R</sup>                                                    | This work                 |
| pRseB-MAC <sup>I249A</sup>          | I249A in pRseB-MAC, Ap <sup>R</sup>                                                    | This work                 |
| pRseB-MAC <sup>E250A</sup>          | E250A in pRseB-MAC, Ap <sup>R</sup>                                                    | This work                 |
| pRseB-MAC <sup>D171A</sup>          | D171A in pRseB-MAC, Ap <sup>R</sup>                                                    | This work                 |
| pRseB-MAC <sup>D174A</sup>          | D174A in pRseB-MAC, Ap <sup>R</sup>                                                    | This work                 |
| pRseB-MAC <sup>D176A</sup>          | D176A in pRseB-MAC, Ap <sup>R</sup>                                                    | This work                 |
| pRseB-MAC <sup>E178A</sup>          | E178A in pRseB-MAC, Ap <sup>R</sup>                                                    | This work                 |

|                                                          |                                                                   |                            |
|----------------------------------------------------------|-------------------------------------------------------------------|----------------------------|
| pRseB-MAC <sup>E181A</sup>                               | E181A in pRseB-MAC, Ap <sup>R</sup>                               | This work                  |
| pRseB-MAC <sup>Q182A</sup>                               | Q182A in pRseB-MAC, Ap <sup>R</sup>                               | This work                  |
| pRseB-MAC <sup>P248C</sup>                               | P248C in pRseB-MAC, Ap <sup>R</sup>                               | This work                  |
| pRseB-MAC <sup>S251C</sup>                               | S251C in pRseB-MAC, Ap <sup>R</sup>                               | This work                  |
| pRseB-MAC <sup>R252C</sup>                               | R252C in pRseB-MAC, Ap <sup>R</sup>                               | This work                  |
| pRseB-MAC <sup>V265C</sup>                               | V265C in pRseB-MAC, Ap <sup>R</sup>                               | This work                  |
| pRseB-MAC <sup>I249A+E250A</sup>                         | I249A+E250A in pRseB-MAC, Ap <sup>R</sup>                         | This work                  |
| pRseB-MAC <sup>D245A+N246A+I249A+E250A</sup>             | D245A+N246A+I249A+E250A in pRseB-MAC, Ap <sup>R</sup>             | This work                  |
| pRseB-MAC <sup>R252A+L253A+Y254A+S255A+D256A+L258A</sup> | R252A+L253A+Y254A+S255A+D256A+L258A in pRseB-MAC, Ap <sup>R</sup> | This work                  |
| pRseB <sup>218-318</sup> -MAC                            | RseB <sup>218-318</sup> in pFlag-MAC, Ap <sup>R</sup>             | This work                  |
| pRseB-ATS                                                | RseB <sup>24-318</sup> in pFlag-ATS, Ap <sup>R</sup>              | This work                  |
| pRseB-ATS <sup>R238A+R239A</sup>                         | R238A+R239A in pRseB-ATS, Ap <sup>R</sup>                         | This work                  |
| pRseB-ATS <sup>D245A</sup>                               | D245A in pRseB-ATS, Ap <sup>R</sup>                               | This work                  |
| pRseB-ATS <sup>N246A</sup>                               | N246A in pRseB-ATS, Ap <sup>R</sup>                               | This work                  |
| pRseB-ATS <sup>I249A</sup>                               | I249A in pRseB-ATS, Ap <sup>R</sup>                               | This work                  |
| pRseB-ATS <sup>E250A</sup>                               | E250A in pRseB-ATS, Ap <sup>R</sup>                               | This work                  |
| pRseB-ATS <sup>D171A</sup>                               | D171A in pRseB-ATS, Ap <sup>R</sup>                               | This work                  |
| pRseB-ATS <sup>D174A</sup>                               | D174A in pRseB-ATS, Ap <sup>R</sup>                               | This work                  |
| pRseB-ATS <sup>D176A</sup>                               | D176A in pRseB-ATS, Ap <sup>R</sup>                               | This work                  |
| pRseB-ATS <sup>E178A</sup>                               | E178A in pRseB-ATS, Ap <sup>R</sup>                               | This work                  |
| pRseB-ATS <sup>E181A</sup>                               | E181A in pRseB-ATS, Ap <sup>R</sup>                               | This work                  |
| pRseB-ATS <sup>Q182A</sup>                               | Q182A in pRseB-ATS, Ap <sup>R</sup>                               | This work                  |
| pRseB-ATS <sup>I249A+E250A</sup>                         | I249A+E250A in pRseB-ATS, Ap <sup>R</sup>                         | This work                  |
| pRseB-ATS <sup>D245A+N246A+I249A+E250A</sup>             | D245A+N246A+I249A+E250A in pRseB-ATS, Ap <sup>R</sup>             | This work                  |
| pRseB-ATS <sup>R252A+L253A+Y254A+S255A+D256A+L258A</sup> | R252A+L253A+Y254A+S255A+D256A+L258A in pRseB-ATS, Ap <sup>R</sup> | This work                  |
| pTrc99a                                                  | Vector, pBR322 ori, Ap <sup>R</sup>                               | Amersham Pharmacia Biotech |
| pRseA-Trc <sup>I173C</sup>                               | I173C mutant of His-tagged RseA periplasmic domain in pTrc99A     | This work                  |
| pRseA-Trc <sup>D179C</sup>                               | D179C mutant of His-tagged RseA periplasmic domain in pTrc99A     | This work                  |
| pRseA-Trc <sup>L186C</sup>                               | L186C mutant of His-tagged RseA periplasmic domain in pTrc99A     | This work                  |
| pRseA-Trc <sup>H187C</sup>                               | H187C mutant of His-tagged RseA periplasmic domain in pTrc99A     | This work                  |

Figure S1

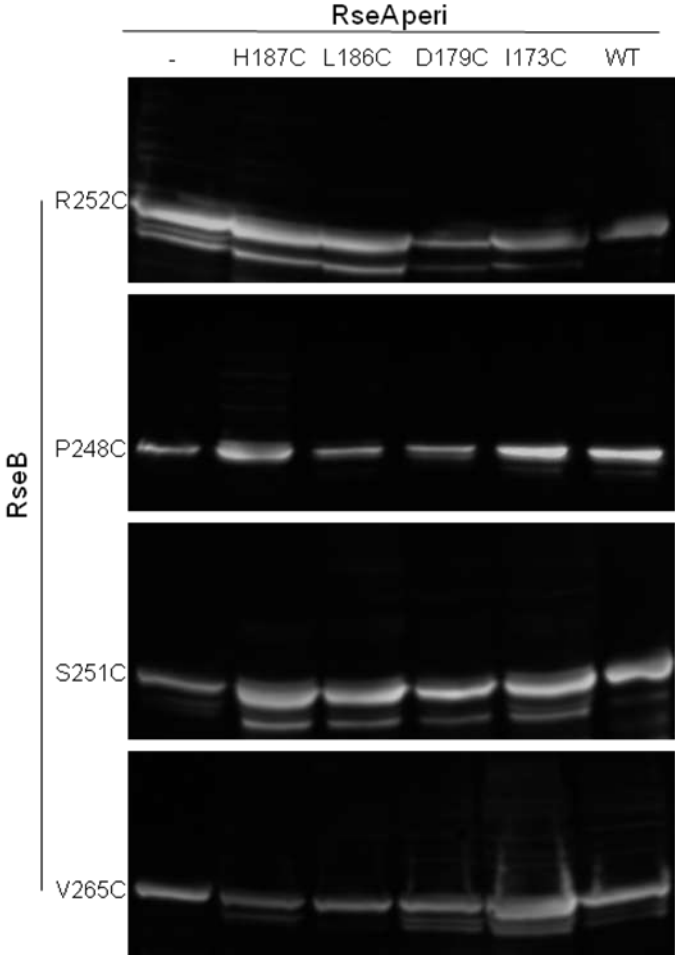

Supplement: M806012200_1.pdf [file M806012200_1.pdf]
